# Supplementary figures and images for: High-resolution mapping of the quantitative trait locus (QTLs) conferring resistance to false smut disease in rice
Source: Research Square preprint supplement (doi:10.21203/rs.3.rs-325960/v1), 2021-03-22

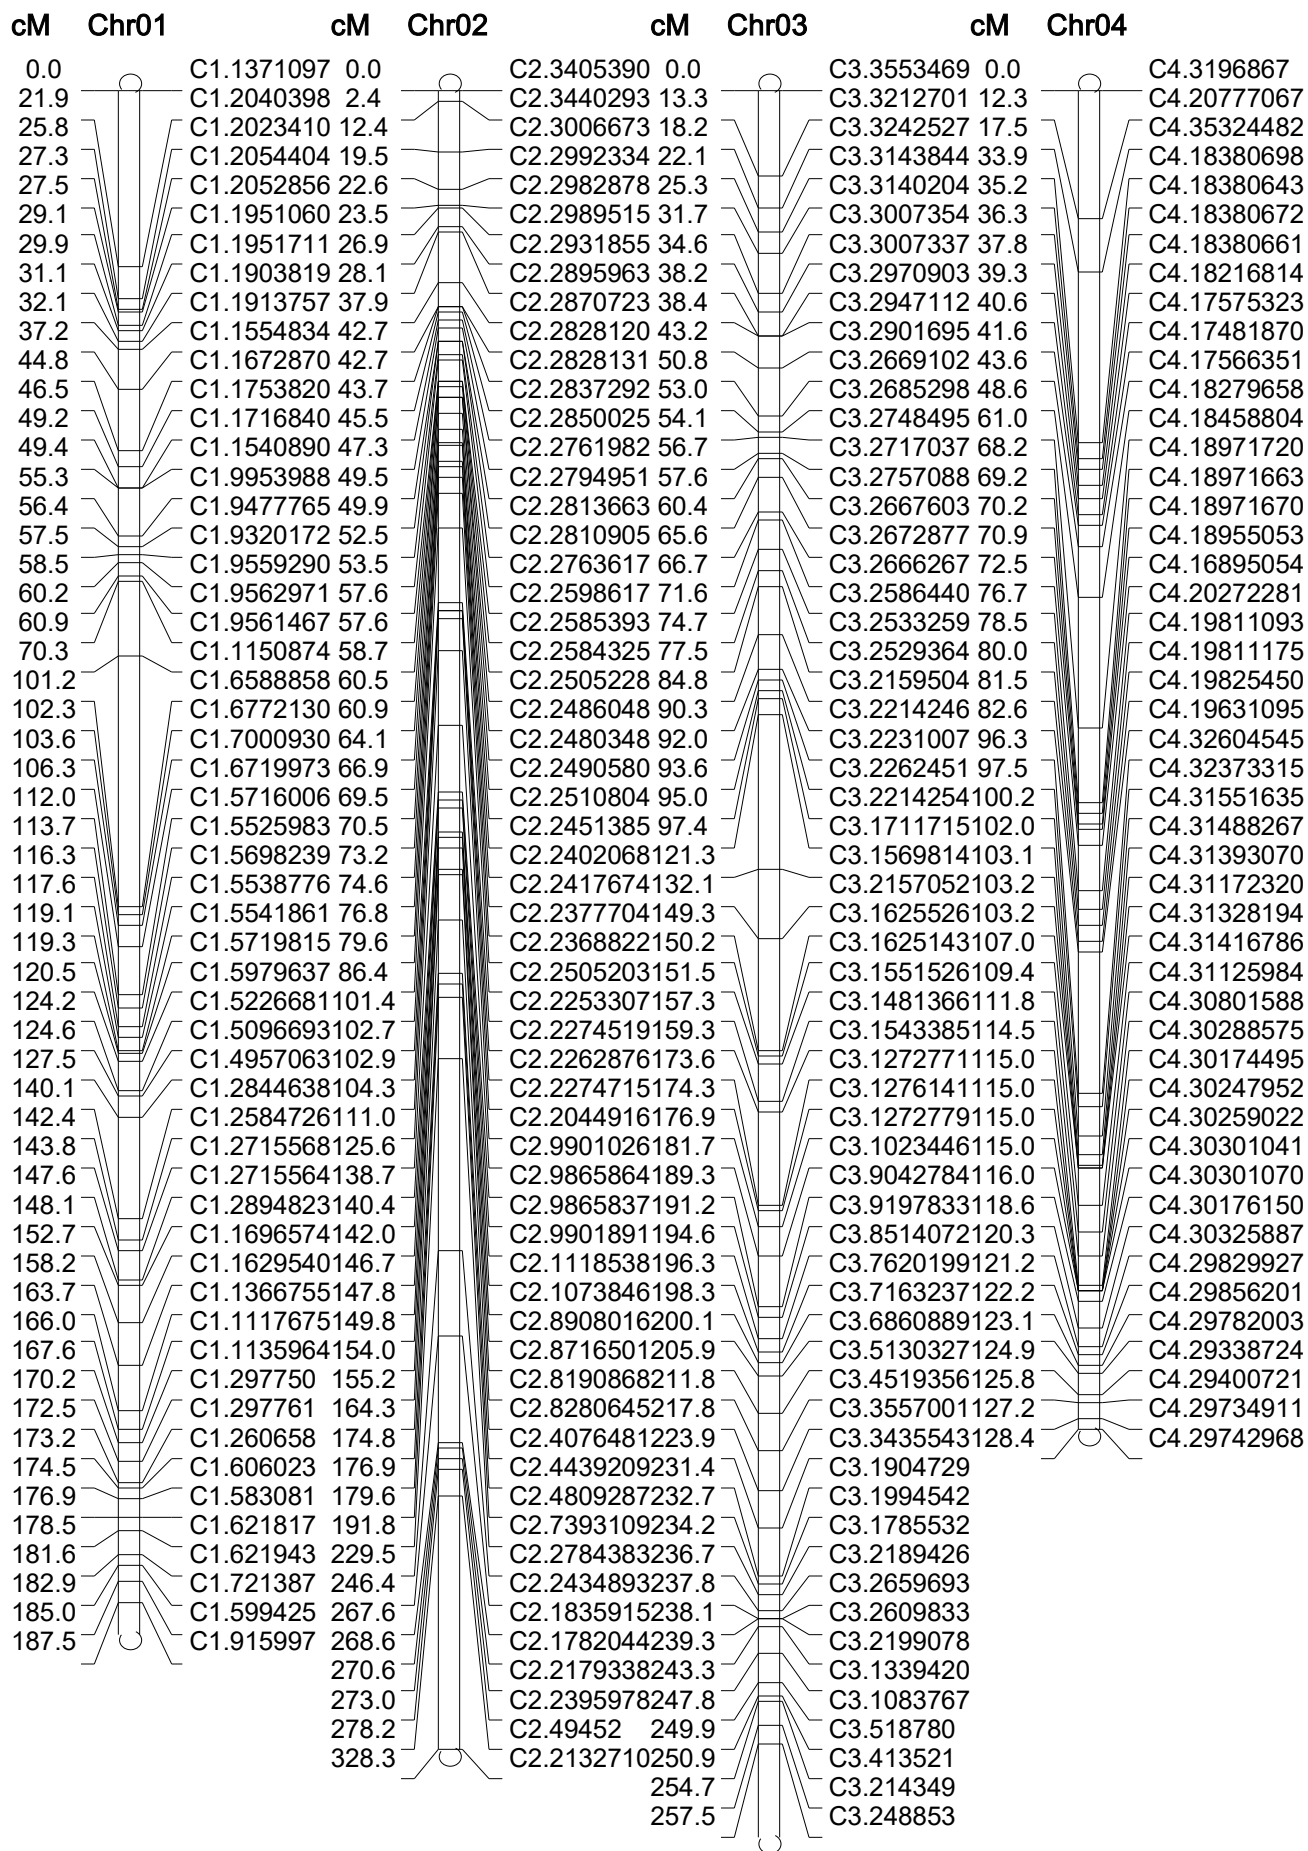

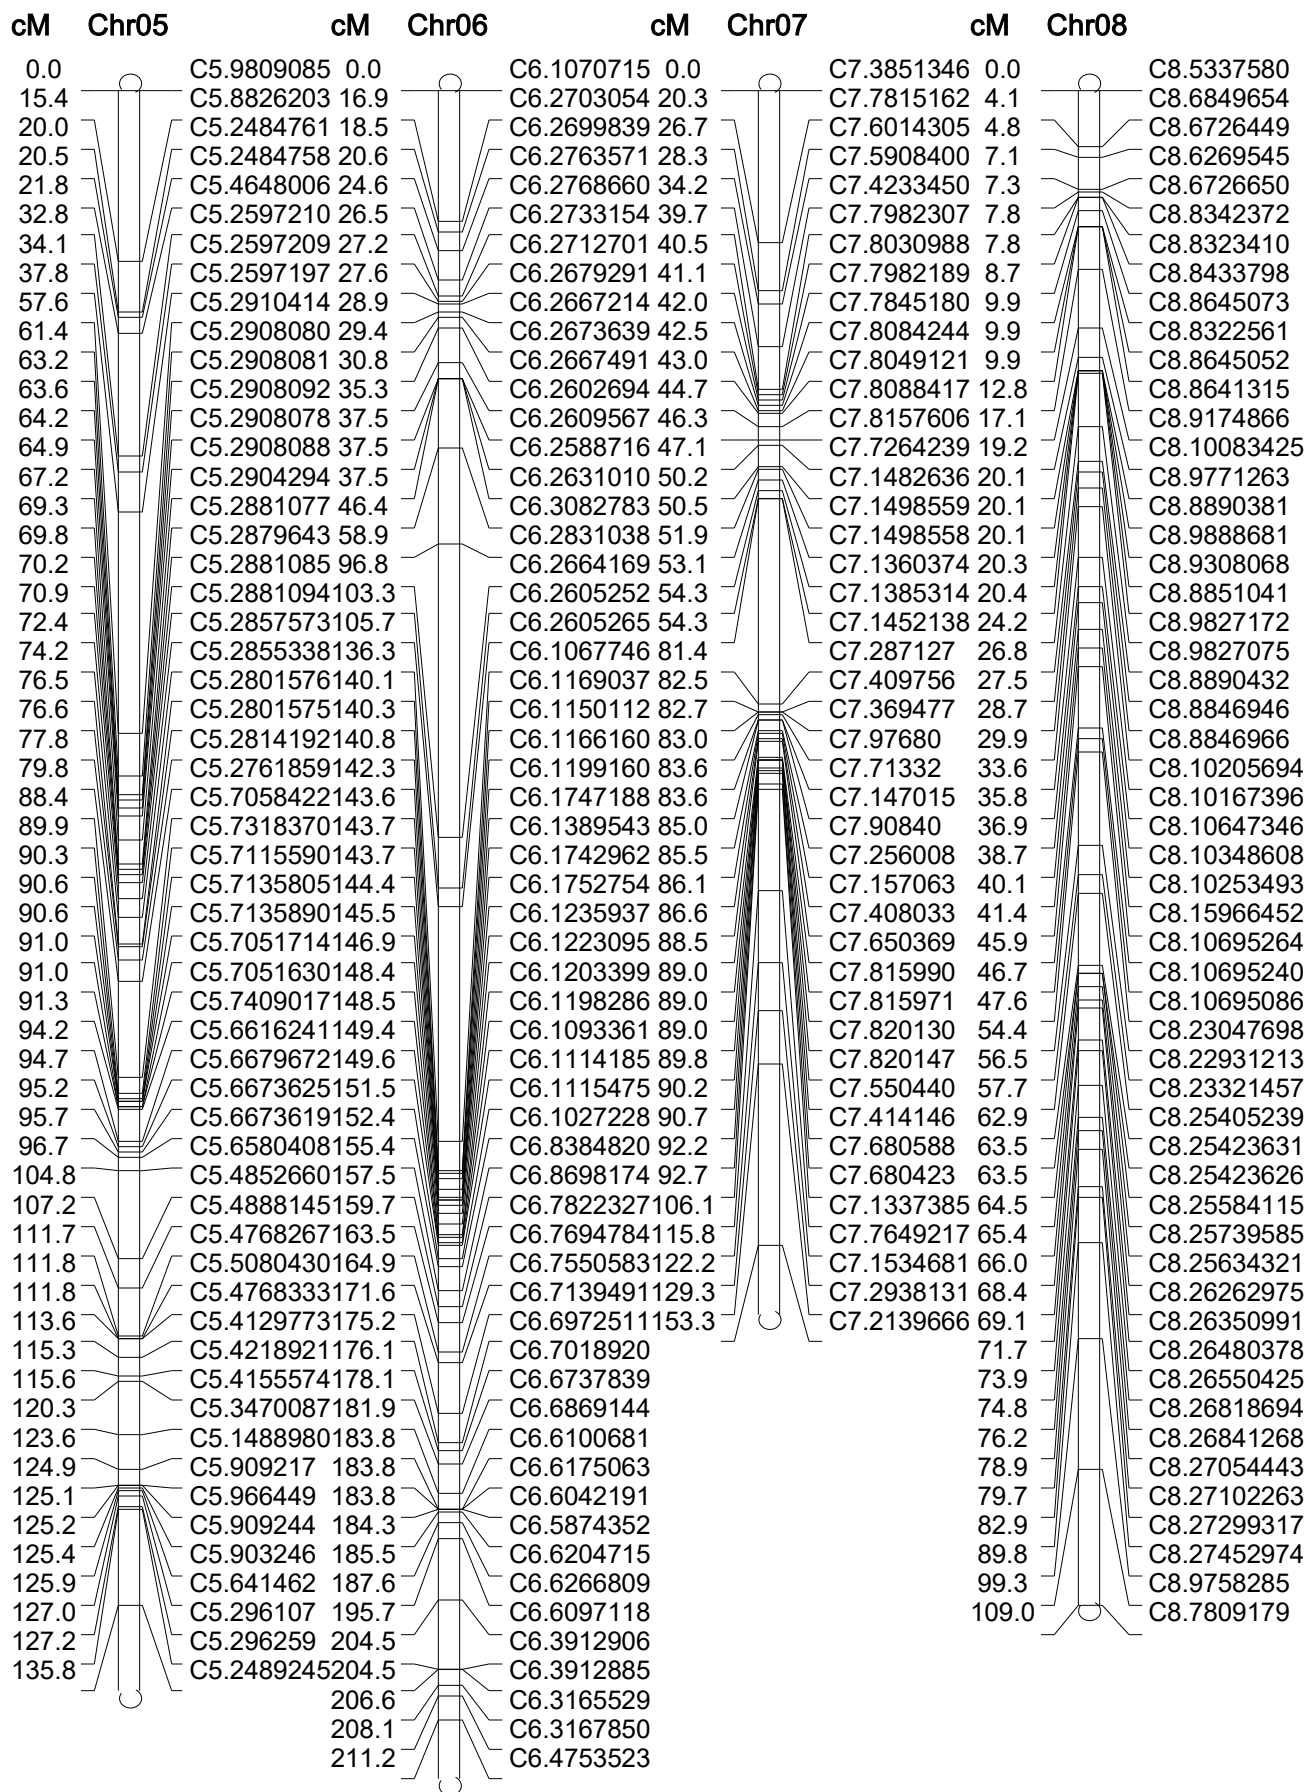

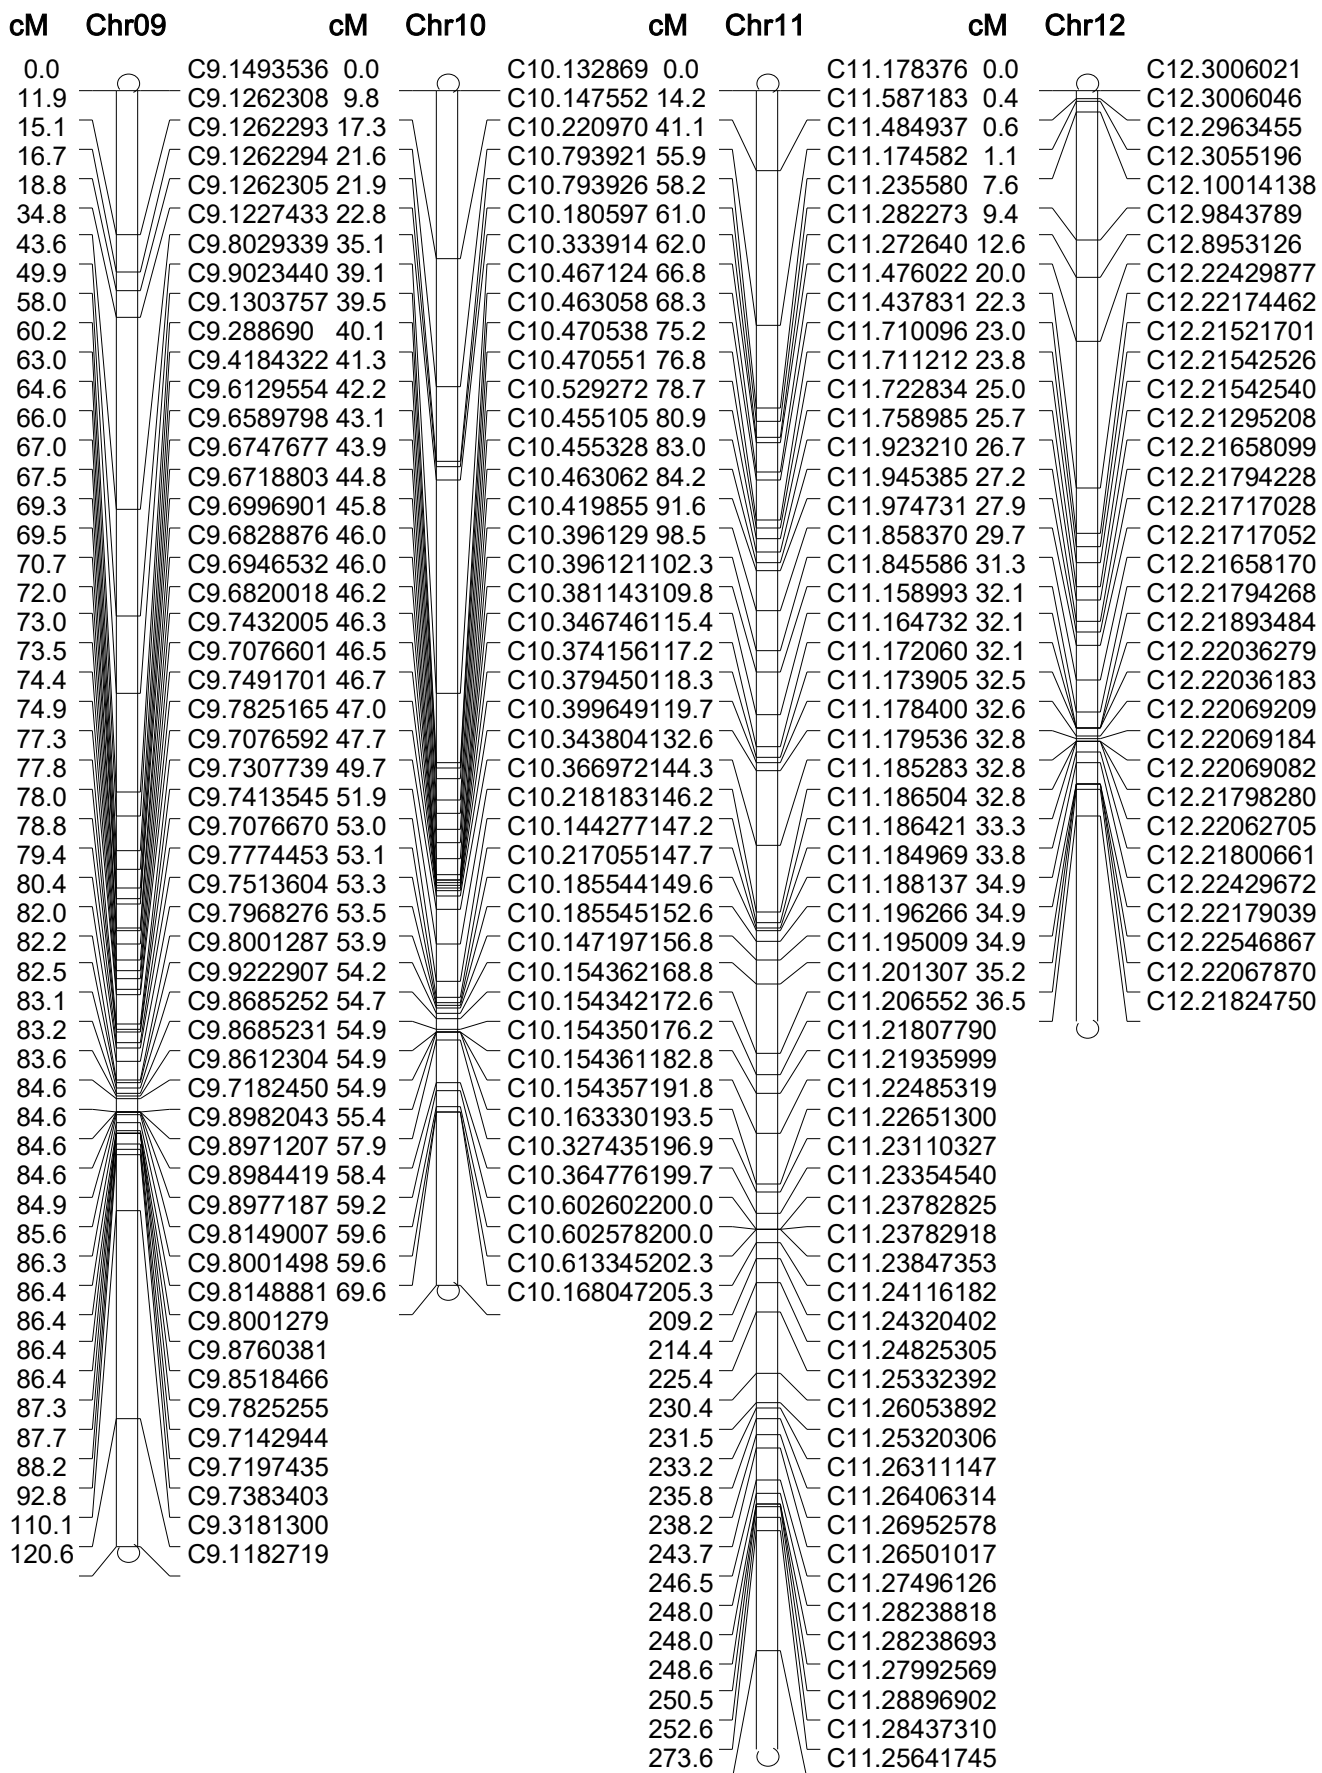

Supplement: Supplementary file 1 [file 14607e8c793e5047f985fbd9.pdf]
